# Supplementary material for: A modulated MOF as a modification layer on copper foil for lithium dendrite suppression
Source: Royal Society of Chemistry journal article supplement (doi:10.1039/d3ta06317h), 2024-01-01
Supplement: d3ta06317h1.pdf [file d3ta06317h1.pdf]

Table S1. Synthesis conditions of Cu-BTC\_RT\_x under room temperature synthesis.

|              | Cu(NO <sub>3</sub> ) <sub>2</sub> ·3H <sub>2</sub> O | H <sub>3</sub> BTC | modulator |
|--------------|------------------------------------------------------|--------------------|-----------|
| Cu-BTC_RT_10 | 0.014 M                                              | 0.009 M            | 0.14 M    |
| Cu-BTC_RT_20 | 0.014 M                                              | 0.009 M            | 0.28 M    |

Table S2. Synthesis conditions of Cu-BTC\_y under solvothermal synthesis.

|           | Cu(NO <sub>3</sub> ) <sub>2</sub> ·3H <sub>2</sub> O | H <sub>3</sub> BTC | modulator |
|-----------|------------------------------------------------------|--------------------|-----------|
| Cu-BTC_0  | 0.12 M                                               | 0.08 M             | -         |
| Cu-BTC_2  | 0.12 M                                               | 0.08 M             | 0.24 M    |
| Cu-BTC_10 | 0.12 M                                               | 0.08 M             | 1.21 M    |
| Cu-BTC_20 | 0.12 M                                               | 0.08 M             | 2.43 M    |

Table S3. Comparison of the cycling stability with the previously reported Li deposition.

| Materials                                                                             | Deposition Capacity (mA h cm <sup>-2</sup> ) | Current Density (mA cm <sup>-2</sup> ) | Coulombic Efficiency (%) | Cycle Number | Nucleation Overpotential (mV) |
|---------------------------------------------------------------------------------------|----------------------------------------------|----------------------------------------|--------------------------|--------------|-------------------------------|
| Crumpled Graphene <sup>1</sup>                                                        | 1                                            | 0.5                                    | 97%                      | 50           |                               |
| Cu-CuO-Ni hybrid structure <sup>2</sup>                                               | 1                                            | 1                                      | 95%                      | 250          |                               |
| Ag@NCS <sup>3</sup>                                                                   | 4                                            | 0.5                                    | 98.6%                    | 400          | ~1                            |
| AgNPs@Cu <sup>4</sup>                                                                 | 1                                            | 1                                      | 94.5%                    | 100          |                               |
| CuO NAs/CF (MOF-derived CuO nanorod arrays on Cu foil current collector) <sup>5</sup> | 1                                            | 1                                      | 98%                      | 180          | 30                            |
| Ag@HKUST-1 <sup>6</sup>                                                               | 1                                            | 0.5                                    | 97%                      | 300          | 3                             |
|                                                                                       | 1                                            | 1                                      | 97.50%                   | 50           |                               |
|                                                                                       | 5                                            | 1                                      | 98.50%                   | 50           |                               |
| Modulated CuBTC <sup>(This work)</sup>                                                | 1                                            | 1                                      | 98.2%                    | 520          | 0.6                           |
| Ag@CuBTC <sup>(This work)</sup>                                                       | 1                                            | 1                                      | 92.3%                    | 70           |                               |

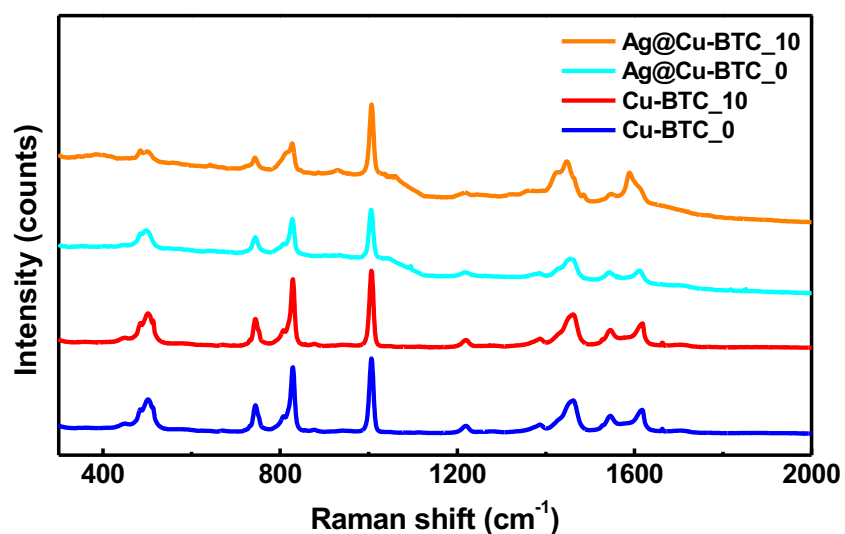

**Figure S1.** Raman spectra of Cu-BTC\_0 and Cu-BTC\_10, and the corresponding silver-doped MOFs Ag@Cu-BTC\_0 and Ag@Cu-BTC\_10.

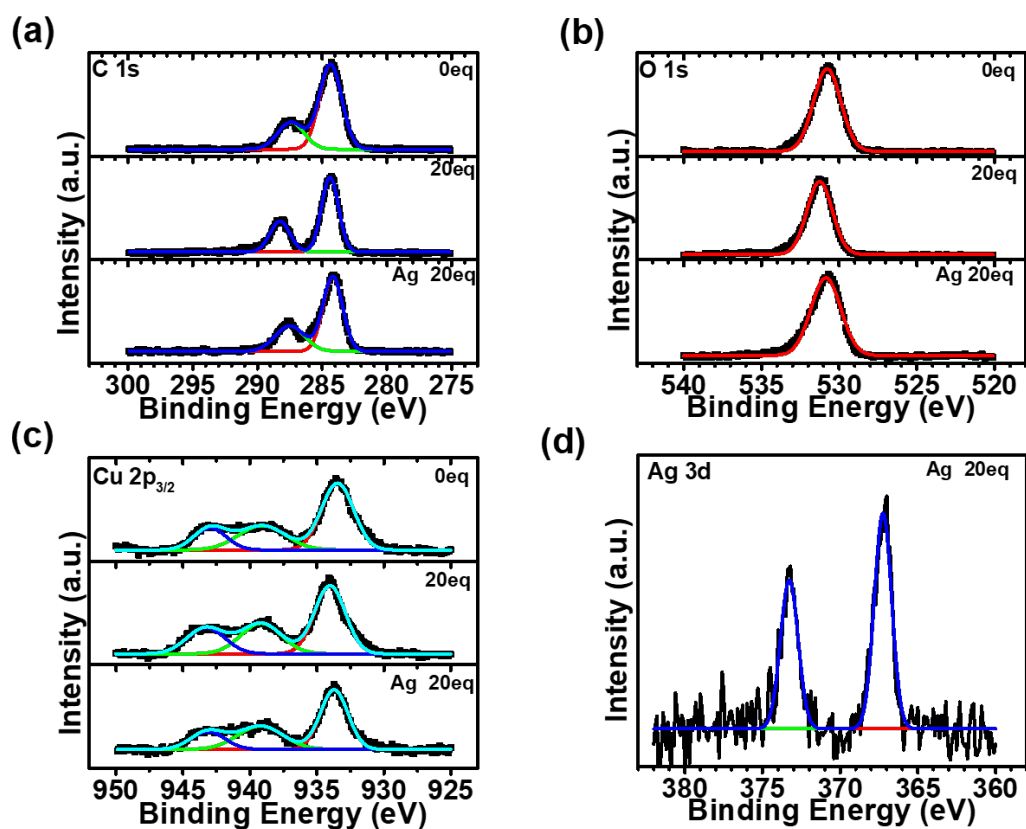

**Figure S2.** XPS (a) C 1s, (b) O 1s, (c) Cu 2p<sub>3/2</sub>, and (d) Ag 3d spectra of Cu-BTC\_0 and Cu-BTC\_20, and the corresponding silver-doped MOF Ag@Cu-BTC\_20.

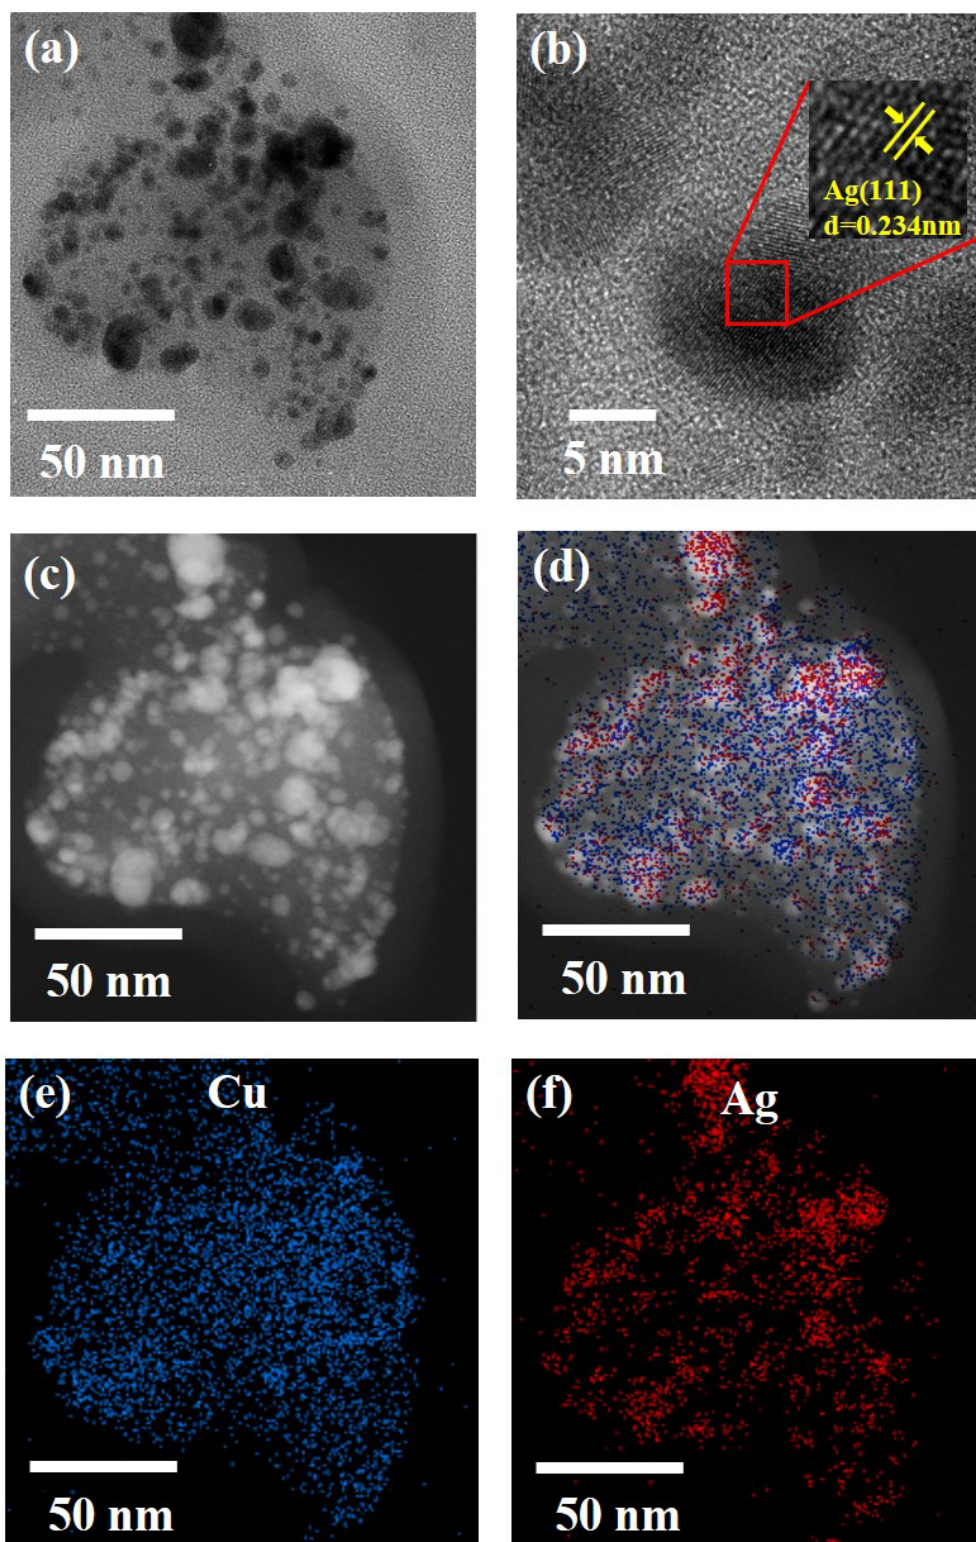

**Figure S3.** The TEM image of Ag@Cu-BTC<sub>10</sub> (a), (b) HRTEM for Ag d-spacing, (c) STEM image, and (d-f) STEM-EDS mapping results.

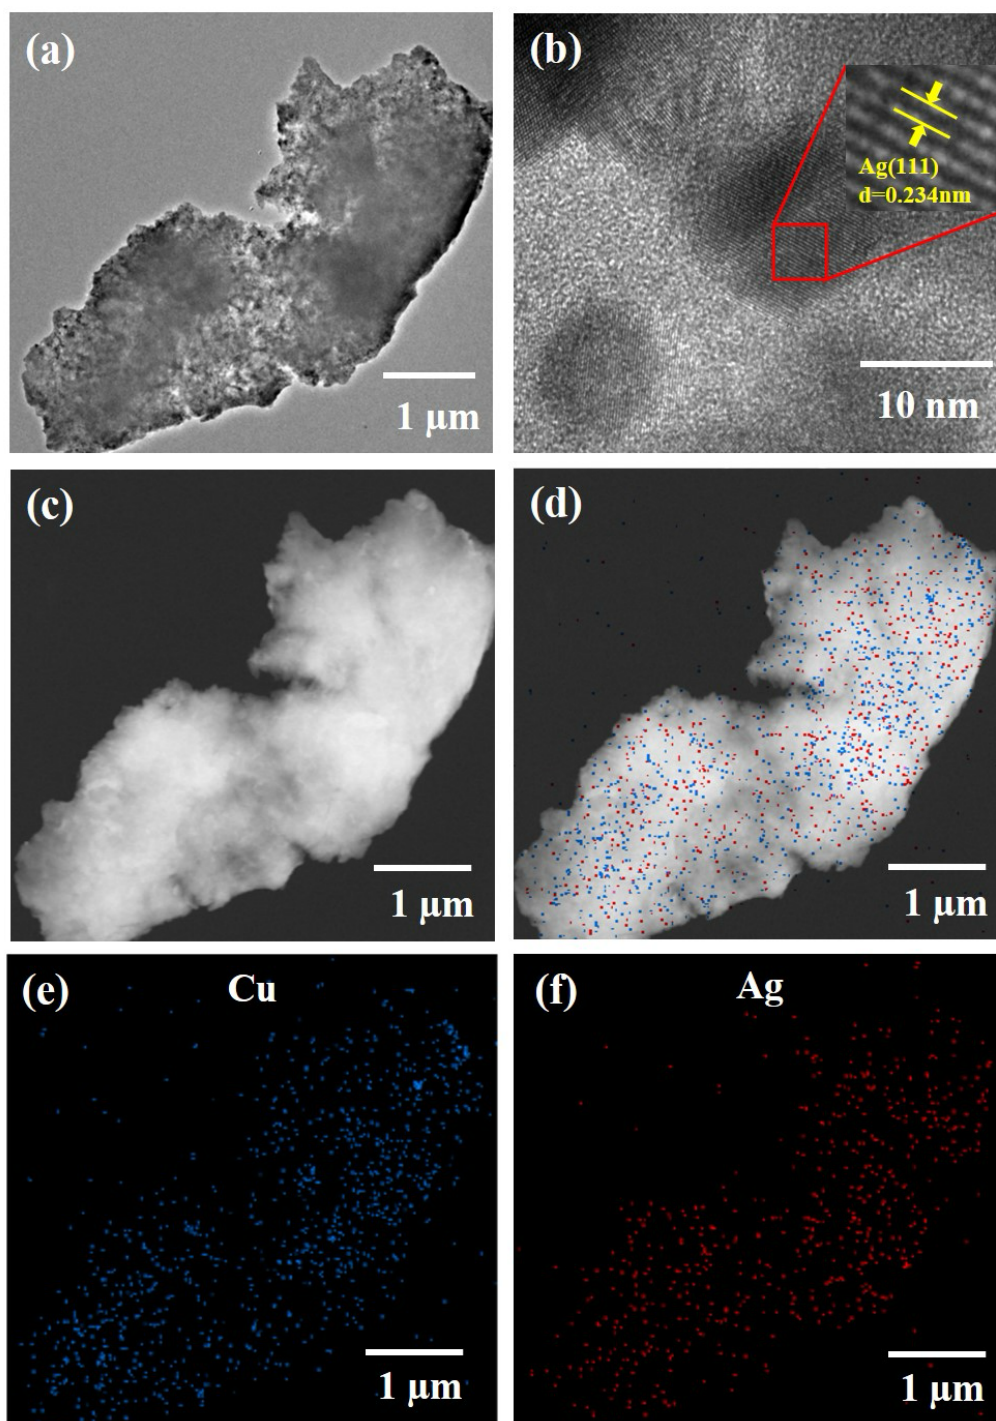

**Figure S4.** The TEM image of Ag@Cu-BTC<sub>0</sub> (a), (b) HRTEM for Ag d-spacing, (c) STEM image, and (d-f) STEM-EDS mapping results.



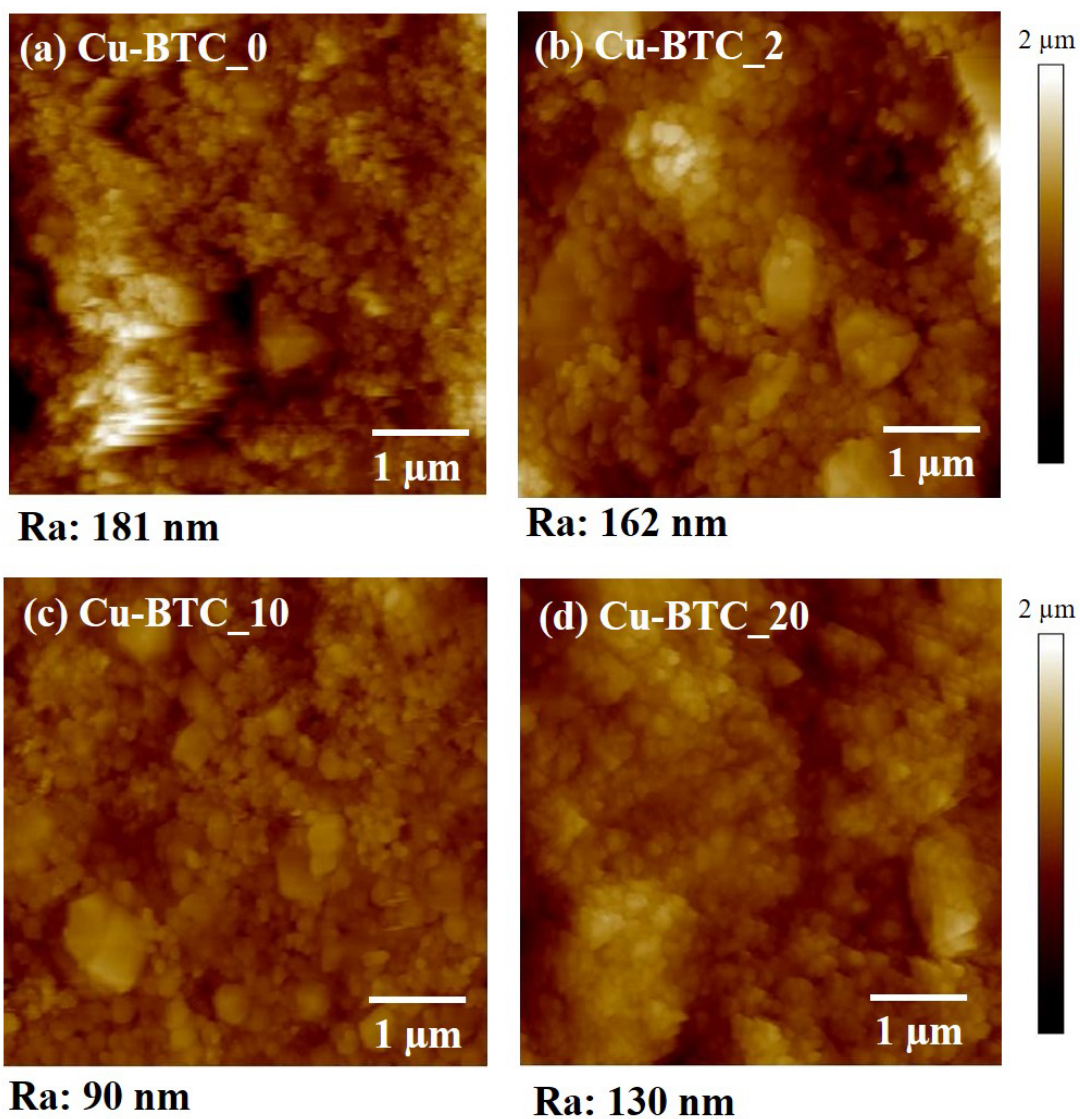

Figure S5. AFM scans of (a-d) Cu-BTC\_0, 2, 10, 20 electrodes.

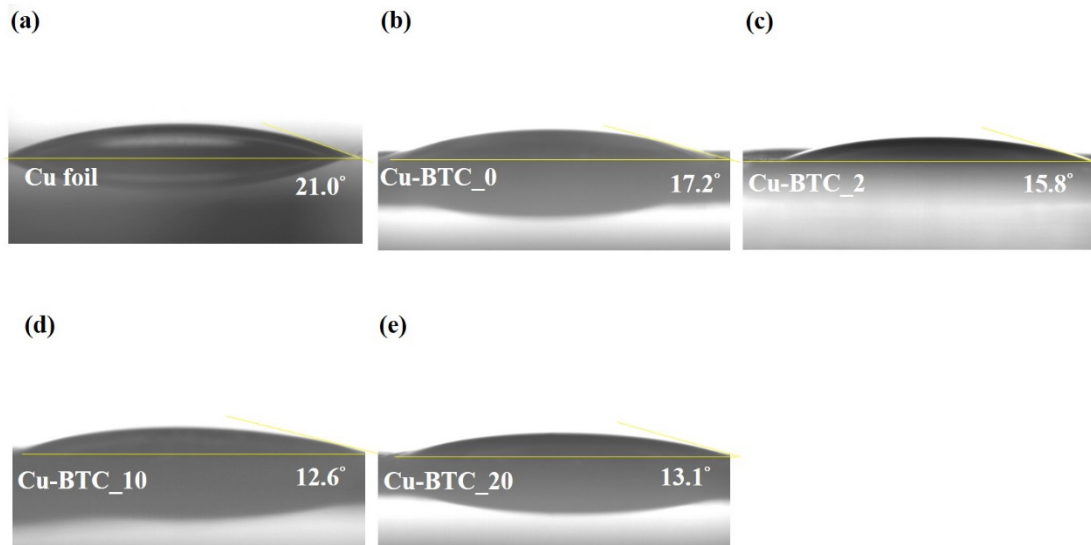

**Figure S6.** Contact angles of electrolyte on the (a) Copper foil, (b-e) Cu-BTC\_0, 2, 10, and 20 electrodes.

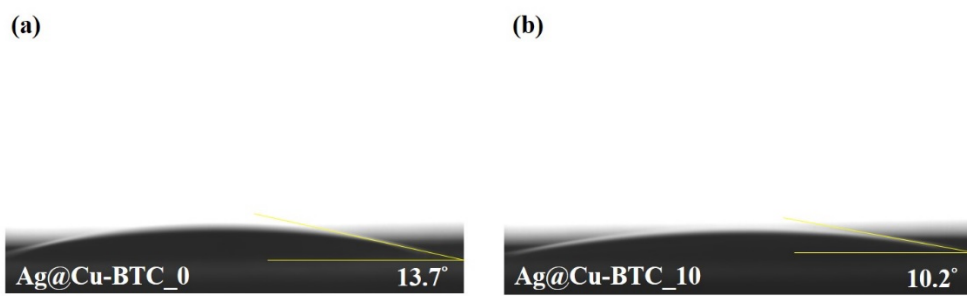

**Figure S7.** Contact angles of electrolyte on the (a) Ag@Cu-BTC\_0 and (b) Ag@Cu-BTC\_10 electrodes.

## Reference

- 1 S. Liu, A. Wang, Q. Li, J. Wu, K. Chiou, J. Huang and J. Luo, *Joule*, 2018, **2**, 184–193.
- 2 S. Wu, Z. Zhang, M. Lan, S. Yang, J. Cheng, J. Cai, J. Shen, Y. Zhu, K. Zhang and W. Zhang, *Adv. Mater.*, 2018, **30**, 1–7.
- 3 Z. Jiang, C. Meng, G. Chen, R. Yuan, A. Li, J. Zhou, X. Chen and H. Song, *J. Colloid Interface Sci.*, 2022, **627**, 783–792.
- 4 Z. Hou, Y. Yu, W. Wang, X. Zhao, Q. Di, Q. Chen, W. Chen, Y. Liu and Z. Quan, *ACS Appl. Mater. Interfaces*, 2019, **11**, 8148–8154.
- 5 L. Wei, L. Li, T. Zhao, N. Zhang, Y. Zhao, F. Wu and R. Chen, *Nanoscale*, 2020, **12**, 9416–9422.
- 6 S. Yuan, J. L. Bao, C. Li, Y. Xia, D. G. Truhlar and Y. Wang, *ACS Appl. Mater. Interfaces*, 2019, **11**, 10616–10623.
